# Supplementary material for: Pentastiridius leporinus (Linnaeus, 1761) as a Vector of Phloem-Restricted Pathogens on Potatoes: ‘Candidatus Arsenophonus Phytopathogenicus’ and ‘Candidatus Phytoplasma Solani’
Source: MDPI journal article supplement (doi:10.3390/insects15030189), 2024-03-13
Supplement: s1 [file s1]

Supplementary material

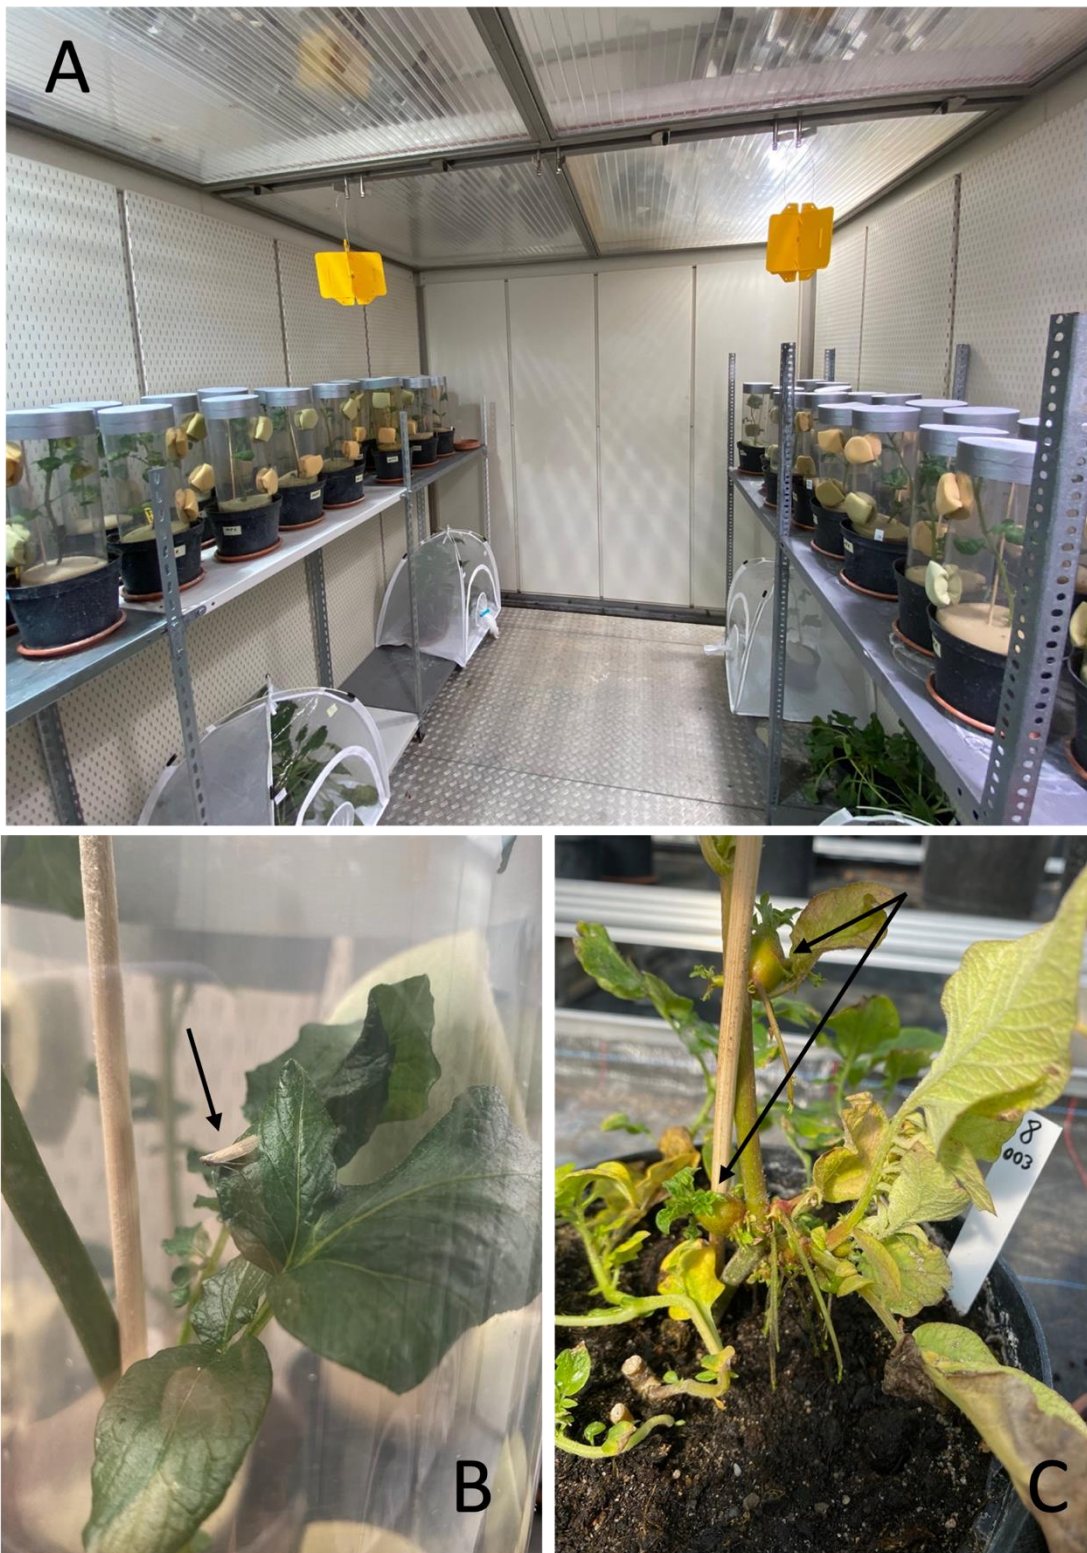

**Figure S1.** Photos of the experimental set-up of the transmission trial. A: Cylinders of the transmission experiment in the climate chamber; B: A female of *Pentastiridius leporinus* inside a transmission cylinder; C: Arrows are pointing to aerial tubers of an infected transmission plant.

**Table S1.** Results of the transmission experiment in more detail. The number of CAp- and CPs-positive insects and potato tubers was determined by real-time PCR analysis.

| Variety                | Plant number |    |    |    |    | Total            |
|------------------------|--------------|----|----|----|----|------------------|
|                        | #1           | #2 | #3 | #4 | #5 | (infection rate) |
| Lilly                  |              |    |    |    |    |                  |
| Insects tested (total) | 9            | 8  | 10 | 8  | 10 | 45               |
| CAp-positive           | 9            | 8  | 10 | 8  | 10 | 45 (100%)        |
| CPs-positive           | 1            | 0  | 0  | 0  | 0  | 1 (2.2%)         |
| Insects not tested     | 1            | 2  | 0  | 2  | 0  | 5                |
|                        |              |    |    |    |    |                  |
| Tubers tested (total)  | 3            | 3  | 3  | 3  | 3  | 15               |
| CAp-positive           | 2            | 0  | 1  | 0  | 1  | 4 (26.7%)        |
| CPs-positive           | 0            | 0  | 0  | 0  | 0  | 0                |
| Merle                  |              |    |    |    |    |                  |
| Insects tested (total) | 9            | 10 | 7  | 7  | 9  | 42               |
| CAp-positive           | 9            | 10 | 7  | 7  | 9  | 42 (100%)        |
| CPs-positive           | 3            | 1  | 0  | 1  | 0  | 5 (11.9%)        |
| Insects not tested     | 1            | 0  | 3  | 3  | 1  | 8                |
|                        |              |    |    |    |    |                  |
| Tubers tested (total)  | 3            | 3  | 3  | 3  | 3  | 15               |
| CAp-positive           | 0            | 0  | 0  | 0  | 0  | 0                |
| CPs-positive           | 1            | 0  | 1  | 1  | 0  | 3 (20%)          |
| Belana                 |              |    |    |    |    |                  |
| Insects tested (total) | 9            | 9  | 10 | 10 | 9  | 47               |
| CAp-positive           | 9            | 9  | 10 | 10 | 9  | 47 (100%)        |
| CPs-positive           | 0            | 2  | 0  | 0  | 0  | 2 (4.2%)         |
| Insects not tested     | 1            | 1  | 0  | 0  | 1  | 3                |
|                        |              |    |    |    |    |                  |
| Tubers tested (total)  | 3            | 3  | 3  | 3  | 3  | 15               |
| CAp-positive           | 1            | 1  | 0  | 2  | 0  | 4 (26.7%)        |
| CPS-positive           | 0            | 0  | 0  | 0  | 0  | 0                |
| Juventa                |              |    |    |    |    |                  |
| Insects tested (total) | 9            | 9  | 10 | 10 | 3  | 41               |
| CAp-positive           | 9            | 9  | 10 | 10 | 3  | 41 (100%)        |
| CPs-positive           | 0            | 0  | 0  | 0  | 0  | 0                |
| Insects not tested     | 1            | 1  | 0  | 0  | 7  | 9                |
|                        |              |    |    |    |    |                  |
| Tubers tested (total)  | 3            | 2  | 3  | 3  | 3  | 14               |
| CAp-positive           | 0            | 1  | 3  | 0  | 0  | 4 (28.6%)        |
| CPs-positive           | 0            | 0  | 0  | 0  | 0  | 0                |
| Gala                   |              |    |    |    |    |                  |
| Insects tested (total) | 7            | 11 | 10 | 10 | 9  | 47               |
| CAp-positive           | 7            | 11 | 10 | 10 | 9  | 47 (100%)        |
| CPs-positive           | 0            | 0  | 6  | 0  | 0  | 6 (12.8%)        |
| Insects not tested     | 3            | 0  | 0  | 0  | 1  | 4                |
|                        |              |    |    |    |    |                  |
| Tubers tested (total)  | 3            | 3  | 3  | 3  | 3  | 15               |
| CAp-positive           | 0            | 2  | 1  | 3  | 3  | 9 (60%)          |
| CPs-positive           | 0            | 0  | 0  | 0  | 0  | 0                |
